# Supplementary material
Source: PubMed Central journal article supplement (PMC3430340)
Supplement: JB.00798-12_zjb999091875so1.pdf [file JB.00798-12_zjb999091875so1.pdf]

**A single amino acid substitution changes the self-assembly status of a type  
IV piliation secretin.**

Nicholas N. Nickerson<sup>1,2,‡</sup>, Sophie S. Abby<sup>3,4</sup>, Eduardo P. C. Rocha<sup>3,4</sup> Mohamed  
Chami<sup>5</sup> and Anthony P. Pugsley<sup>1,2\*</sup>

<sup>1</sup>. Institut Pasteur, Molecular Genetics Unit, Microbiology Department, rue du  
Docteur Roux, 75015 Paris, France

<sup>2</sup>. CNRS ERA3526, rue du Docteur Roux, 75015 Paris, France

<sup>3</sup>. Institut Pasteur, Microbial Evolutionary Genomics, Genomes and Genetics  
Department, rue du Docteur Roux, 75015 Paris, France

<sup>4</sup>. CNRS, UMR3525, rue du Docteur Roux, 75015 Paris, France

<sup>5</sup>. Center for Cellular Imaging and Nanoanalytics, Biozentrum, University of Basel,  
CH-4058 Basel, Switzerland

<sup>‡</sup> Current address: Department of Molecular and Cellular Biology, University of  
Guelph, Guelph, Ontario, Canada N1G 2W1

Running title: Secretin auto-assembly

\*To whom correspondence should be addressed. Institut Pasteur, rue du Docteur  
Roux, 75724 Paris Cedex 15, France. Tel ++33 140613762, E-mail,  
[max@pasteur.fr](mailto:max@pasteur.fr)

Table S1. Strains and plasmids

| Strains/plasmids | Vectors, genotypes and relevant characteristics                                               | Reference/source              |
|------------------|-----------------------------------------------------------------------------------------------|-------------------------------|
| Stains           |                                                                                               |                               |
| PAP105           | $\Delta(lac-pro) F' (lacI^{q1} \Delta lacZM15 proAB^+ Tn10)$                                  | Lab collection                |
| BL21(DE3)        | <i>E. coli</i> B F' <i>ompT hsdS gal</i> ( $\lambda$ DE3) <i>endA</i>                         | Studier <i>et al.</i> (1990)  |
| Plasmids         |                                                                                               |                               |
| pCHAP3783        | pIVEX2.3MCS- <i>pilQ</i> <sup>MC58</sup> <i>Neisseria meningitidis</i> (MC58)                 | Guilvout <i>et al.</i> (2008) |
| pCHAP3731        | pIVEX2.3MCS- <i>pulD</i> <sup>28-660</sup>                                                    | Guilvout <i>et al.</i> (2008) |
| pCHAP3716        | pIVEX2.3MCS- <i>pulD</i> <sup>28-42/259-660</sup>                                             | Guilvout <i>et al.</i> (2008) |
| pCHAP3635        | pSU18 <i>p<sub>lac</sub>pulD</i>                                                              | Guilvout <i>et al.</i> (1999) |
| pCHAP8243        | pBR322 <i>pulS</i> , <i>pelBsp-pulAB pulC-O ΔpulD</i>                                         | Guilvout <i>et al.</i> (1999) |
| pCHAP585         | pUC19 <i>p<sub>lac</sub>pulS</i>                                                              | Guilvout <i>et al.</i> (1999) |
| pDIA17           | pACYC184- <i>lacI<sup>q1</sup></i>                                                            | Munier <i>et al.</i> (1991)   |
| pIVEX2.3MCS      | Expression vector with T7 promoter                                                            | Roche Applied Science         |
| pCHAP9147        | pIVEX2.3MCS-pIV (f1 filamentous phage secretin)                                               | This study                    |
| pCHAP9117        | pIVEX2.3MCS- <i>pilQ</i> <sup>MC58</sup> Thr <sub>359</sub> Ser/Pro <sub>613</sub> Leu        | This study                    |
| pCHAP9119        | pIVEX2.3MCS- <i>pilQ</i> <sup>MC58</sup> Thr <sub>359</sub> Ser                               | This study                    |
| pCHAP9120        | pIVEX2.3MCS- <i>pilQ</i> <sup>MC58</sup> Pro <sub>613</sub> Leu                               | This study                    |
| pCHAP9121        | pIVEX2.3MCS- <i>pulD</i> <sup>28-660</sup> Pro <sub>443</sub> Leu                             | This study                    |
| pCHAP9122        | pIVEX2.3MCS- <i>pulD</i> <sup>28-42/259-660</sup> Pro <sub>443</sub> Leu                      | This study                    |
| pCHAP9124        | pSU18- <i>P<sub>lac</sub>pulD</i> Pro <sub>443</sub> Leu                                      | This study                    |
| pCHAP9129        | pIVEX2.3MCS- <i>pilQ</i> <sup>8013</sup> <i>Neisseria meningitidis</i> (8013)                 | This study                    |
| pCHAP9132        | pIVEX2.3MCS- <i>pilQ</i> <sup>8013</sup> <i>N. meningitidis</i> (8013) Pro <sub>605</sub> Leu | This study                    |
| pHH41            | pIVEX2.3MCS- <i>pilQ</i> <sup>PAK</sup> <i>Pseudomonas aeruginosa</i> (PAK)                   | Hoang <i>et al.</i> (2011)    |
| pCHAP9162        | pIVEX2.3MCS- <i>pilQ</i> <sup>PAK</sup> <i>P. aeruginosa</i> (PAK) Pro <sub>562</sub> Leu     | This study                    |
| pCHAP9166        | pIVEX2.3MCS- <i>lspD</i> <i>Legionella pneumophila</i>                                        | This study                    |
| pCHAP9167        | pIVEX2.3MCS- <i>gspD</i> <i>Shewanella oneidensis</i>                                         | This study                    |
| pCHAP9169        | pIVEX2.3MCS- <i>xpsD</i> <i>Xanthomonas campestris</i>                                        | This study                    |
| pCHAP9164        | T7 promoter - <i>Aeromonas hydrophila</i> linear template                                     | This study                    |
| pCHAP9168        | T7 promoter - <i>Vibrio cholera</i> linear template                                           | This study                    |

**Table S2. Primer sequences**

| Name         | Primer sequence <sup>a</sup> (5'-3')             | Restriction site/mutation |
|--------------|--------------------------------------------------|---------------------------|
| PNN5         | GGAAACATTACAGACATCAAAG                           |                           |
| PNN6         | CCTCAATAGCGCAGGCTG                               |                           |
| PNN20        | GATATTCTCGCCACGctgAGCATCGTTACCCTC                | Pro <sub>443</sub> Leu    |
| PNN21        | GAGGGTAACGATGCTcagCGTGGCGAGAATATC                | Pro <sub>443</sub> Leu    |
| PNN73        | CCAAAACGCTTGCCAAAtgCGCGTGCTGACCCAAAAC            | Pro <sub>613</sub> Ala    |
| PNN74        | GTTTTGGGTCAGCACGCGcgcATTGGCAAGCGTTTTGG           | Pro <sub>613</sub> Ala    |
| PNN75        | CCAAAACGCTTGCCAAAtggCGCGTGCTGACCCAAAAC           | Pro <sub>613</sub> Gly    |
| PNN76        | GTTTTGGGTCAGCACGCGgccATTGGCAAGCGTTTTGG           | Pro <sub>613</sub> Gly    |
| PNN77        | CCAAAACGCTTGCCAAAtgtCGCGTGCTGACCCAAAAC           | Pro <sub>613</sub> Val    |
| PNN78        | GTTTTGGGTCAGCACGCGcacATTGGCAAGCGTTTTGG           | Pro <sub>613</sub> Val    |
| PNN79        | CCAAAACGCTTGCCAAAtgcCGCGTGCTGACCCAAAAC           | Pro <sub>613</sub> Cys    |
| PNN80        | GTTTTGGGTCAGCACGCGgcaATTGGCAAGCGTTTTGG           | Pro <sub>613</sub> Cys    |
| PNN81        | CCAAAACGCTTGCCAAAttcCGCGTGCTGACCCAAAAC           | Pro <sub>613</sub> Phe    |
| PNN82        | GTTTTGGGTCAGCACGCGgaaATTGGCAAGCGTTTTGG           | Pro <sub>613</sub> Phe    |
| PNN38        | CGCTTGCCAATCCGagcGTGCTGACCCAAAACC                | Arg <sub>614</sub> Ser    |
| PNN39        | GGTTTTGGGTCAGCACGcctCGGATTGGCAAGCG               | Arg <sub>614</sub> Ser    |
| PNN43        | CCAAAACGCTTGCCaccCCGCGCGTGCTGACCC                | Asn <sub>612</sub> Thr    |
| PNN44        | GGGTCAGCACGCGGggtGGCAAGCGTTTTGG                  | Asn <sub>612</sub> Thr    |
| PNN34        | CGCTTGCCAATctgCGCGTGCTGACCC                      | Pro <sub>605</sub> Leu    |
| PNN35        | GGGTCAGCACGCGcagATTGGCAAGCG                      | Pro <sub>605</sub> Leu    |
| PNN71        | CGGCGAGATCGTCTCCCAActgAAGGTCTGACCTCGGACAAG       | Pro <sub>562</sub> Leu    |
| PNN72        | CTTGTCCGAGGTCAGACCTTcagTTGGGAGACGATCTCGCCG       | Pro <sub>562</sub> Leu    |
| PNN30        | gaattccatagGAAACATTACAGACATCAAAG                 | NdeI                      |
| PNN31        | cgcgatccggccggccTCAATAGCGCAGGCTGTTGCC            | BamHI-Fsel                |
| PNN59        | ggaattccatagCAAGTAATTGAAATGAATAATTTCGC           | NdeI                      |
| PNN60        | cgcgatccCTACAGGGCGCGTACTATGG                     | BamHI                     |
| Legion-For   | ggaattccatagAATGATGTCAATATTTCAACCGTAAC           | NdeI                      |
| Legion-Rev   | cgcgagctcTTATTTGGTCATTTTTGATGAGTATTG             | SacI                      |
| Shewan-For   | ggaattccatagGAACAATATGCGGCCAACTTTAAG             | NdeI                      |
| Shewan-Rev   | cgcgatccTCATTGTGTTTTATCTTTGTTTTTG                | BamHI                     |
| Xanth-For    | ggaattccatagGCCGATGCACCGCGGGTG                   | NdeI                      |
| Xanth-Rev    | cgcgatccTCAGCGCGTGCGCGGCGC                       | BamHI                     |
| Aerom-Lin-F  | ctttaagaaggagatataccatgACCGAATATTCGCCAGCTTC      | T7 promoter               |
| Aerom-Lin-R  | tgatgatgagaacccccTTACTTGTTACCCACGAATGGC          | T7 terminator             |
| Vibrio-Lin-F | ctttaagaaggagatataccatgAACGAGTTTAGCGCCAGCTTTAAAG | T7 promoter               |
| Vibrio-Lin-R | tgatgatgagaacccccTCATTGCTTGCTTCCATCTG            | T7 terminator             |

<sup>a</sup> Lower case letters correspond to either restriction enzyme sequence, base substitution in mutagenic primers or additional sequence recommended for linear template production.

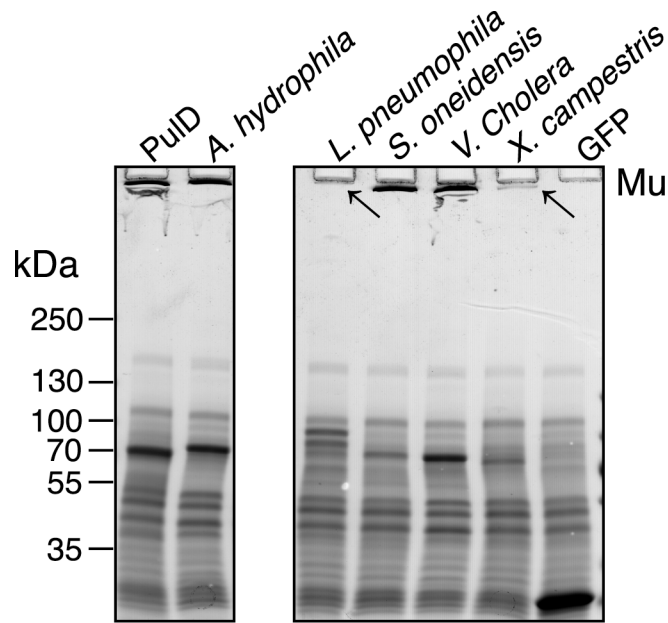

FIG S1 Multimerization of T2SS secretins. Secretins from *Klebsiella oxytoca* (PuID), *A. hydrophila* (ExeD), *L. pneumophila* (LspD), *S. oneidensis* (GspD), *V. Cholera* (EpsD), *X. campestris* (XcsD), and a green fluorescent protein (GFP) control were synthesized in the *E. coli* RTS 100 *in vitro* transcription-translation system supplemented with lecithin liposomes. Aliquots from each sample were diluted in SDS sample buffer, separated by SDS-PAGE on a 4-20% gradient gel and stained with Coomassie blue. Secretin multimers are visible at the bottom of sample wells and arrows denote trace amounts of *L. pneumophila* and *X. campestris* multimer. Mu, multimer.

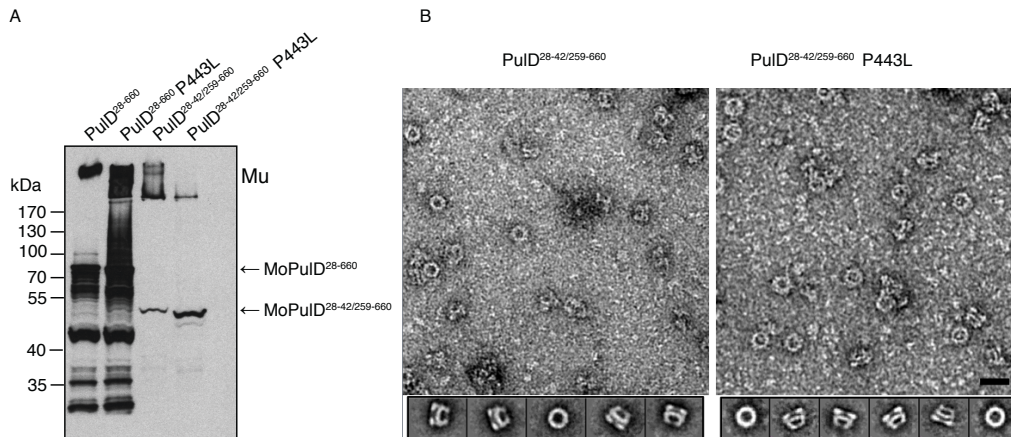

FIG S2 PuIDP443L can multimerize and is structurally similar to wild type PuID. (A) Total *in vitro* synthesis reactions of full length (PuID<sup>28-660</sup>) and truncated (PuID<sup>28-42/259-660</sup>) PuID wild type and P443L variant analyzed by SDS-PAGE and immunoblotting with PuID-specific antisera. Mu, multimer; Mo, monomer. (B) PuID<sup>28-42/259-660</sup> and PuID<sup>28-42/259-660</sup>P443L produced in the *in vitro* synthesis reaction, purified on magnetic nickel beads, negatively stained and analyzed by electron microscopy. Bottom panels show class averages of 363 (PuID<sup>28-42/259-660</sup>) and 307 (PuID<sup>28-42/259-660</sup>P443L) manually selected secretin particles. The scale bar represents 25 nm.
